# Supplementary material for: Source apportionment of aerosol particles near a steel plant by electron microscopy
Source: Royal Society of Chemistry journal article supplement (doi:10.1039/c2em30696d), 2012-01-01
Supplement: c2em30696d.pdf [file c2em30696d.pdf]

## Electronic supplementary information

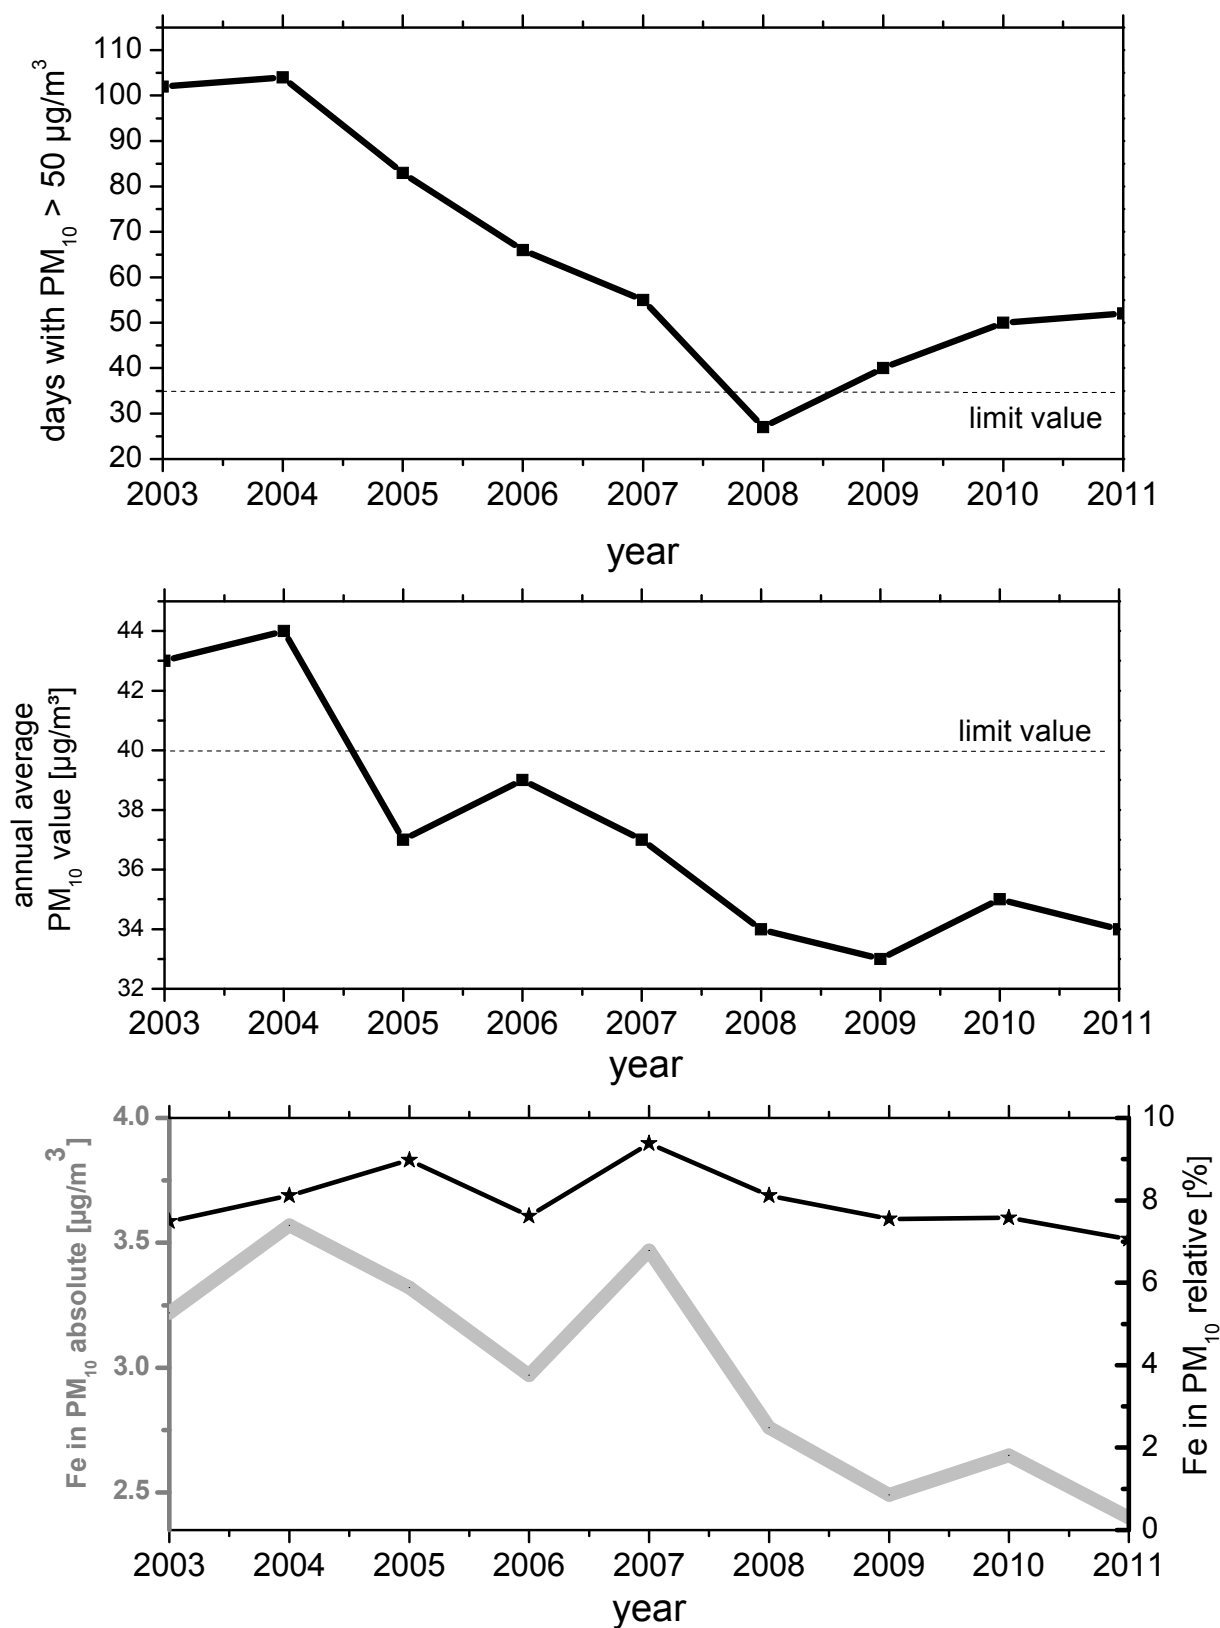

**Figure S1:** Annual number of  $PM_{10}$  exceeding days (top), annual mean values of  $PM_{10}$  (middle), and annual absolute and relative iron abundance within  $PM_{10}$  (bottom) at the

monitoring station DUM2 in Duisburg-Marxloh (Landesamt für Natur, Umwelt und Verbraucherschutz Nordrhein-Westfalen, Essen, Germany; data available at: [http://www.lanuv.nrw.de/luft/immissionen/ber\\_trend/kenn.htm](http://www.lanuv.nrw.de/luft/immissionen/ber_trend/kenn.htm)).
